# Supplementary material for: Comparative Metabolomics Study of the Impact of Articaine and Lidocaine on the Metabolism of SH-SY5Y Neuronal Cells
Source: MDPI journal article supplement (doi:10.3390/metabo12070581), 2022-06-23
Supplement: s1 [file s1]

## **Supplementary Information**

### **Comparative metabolomics study of the impact of articaine and lidocaine on the metabolism of SH-SY5Y neuronal cells**

**Gustavo H. Rodrigues da Silva<sup>1,2</sup>, Luís F. Mendes<sup>1</sup>, Fabíola V. de Carvalho<sup>2</sup>, Eneida de Paula<sup>2</sup>, Iola F. Duarte<sup>1\*</sup>**

<sup>1</sup> CICECO—Aveiro Institute of Materials, Department of Chemistry, University of Aveiro, Aveiro, Portugal;

<sup>2</sup> Department of Structural and Functional Biology, Institute of Biology, University of Campinas (UNICAMP), Campinas, SP, Brazil.

\*Correspondence: [ioladuarte@ua.pt](mailto:ioladuarte@ua.pt)

**Figure S1.** Relative levels of extracellular metabolites in cells-conditioned medium, normalized to the initial levels in the acellular medium (100%). The graphs are grouped according to the differences detected in the medium of ATC- and/or LDC-treated cells compared to that of untreated controls. Statistical significance calculated in respect to controls (\* p<0.05; \*\*p<0.01; \*\*\*p<0.005; \*\*\*\*p<0.001).

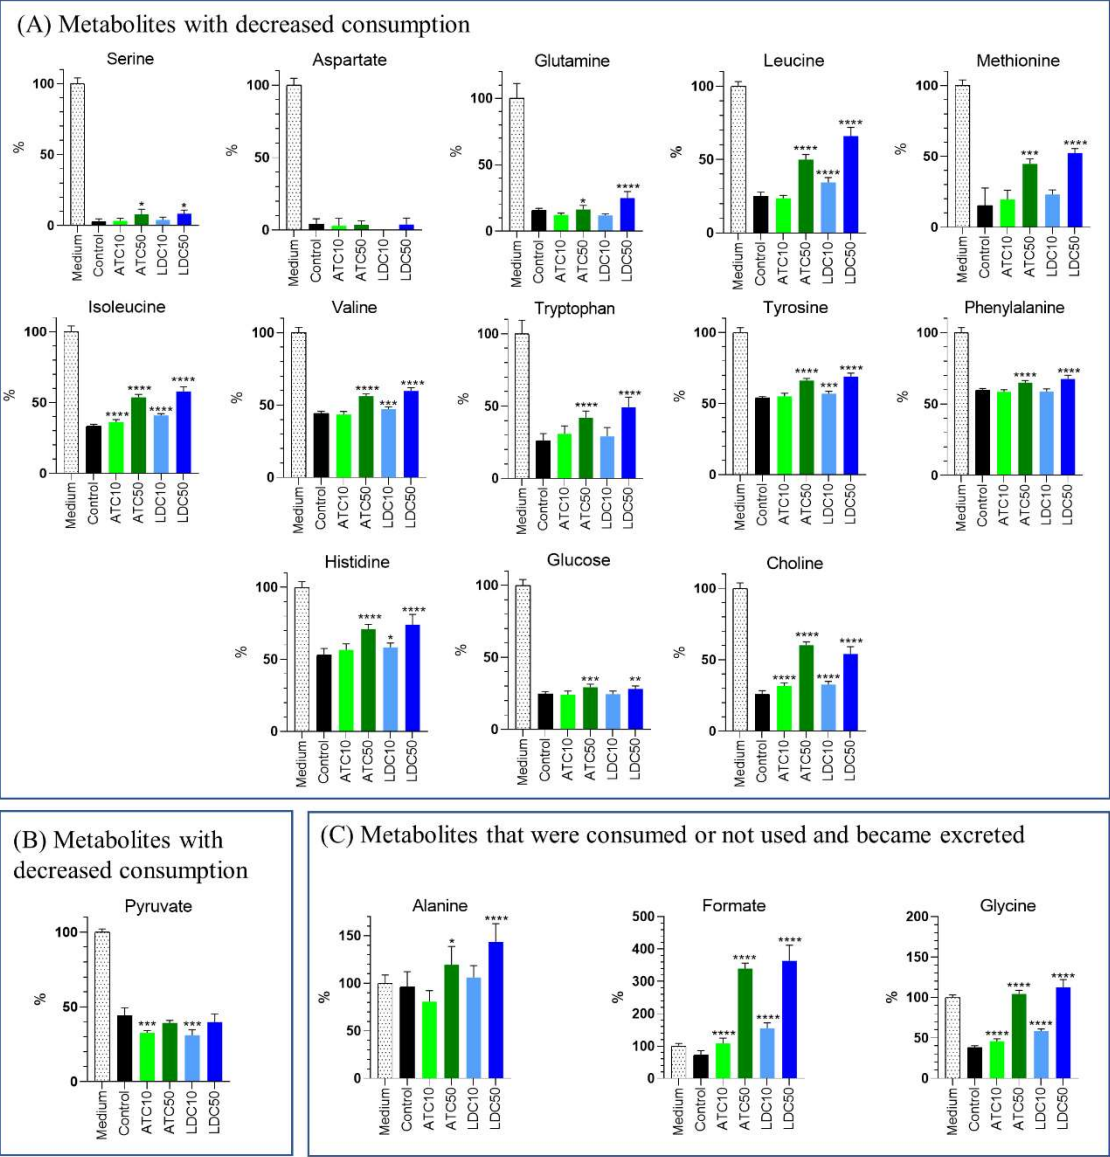

Figure S1 (cont.)

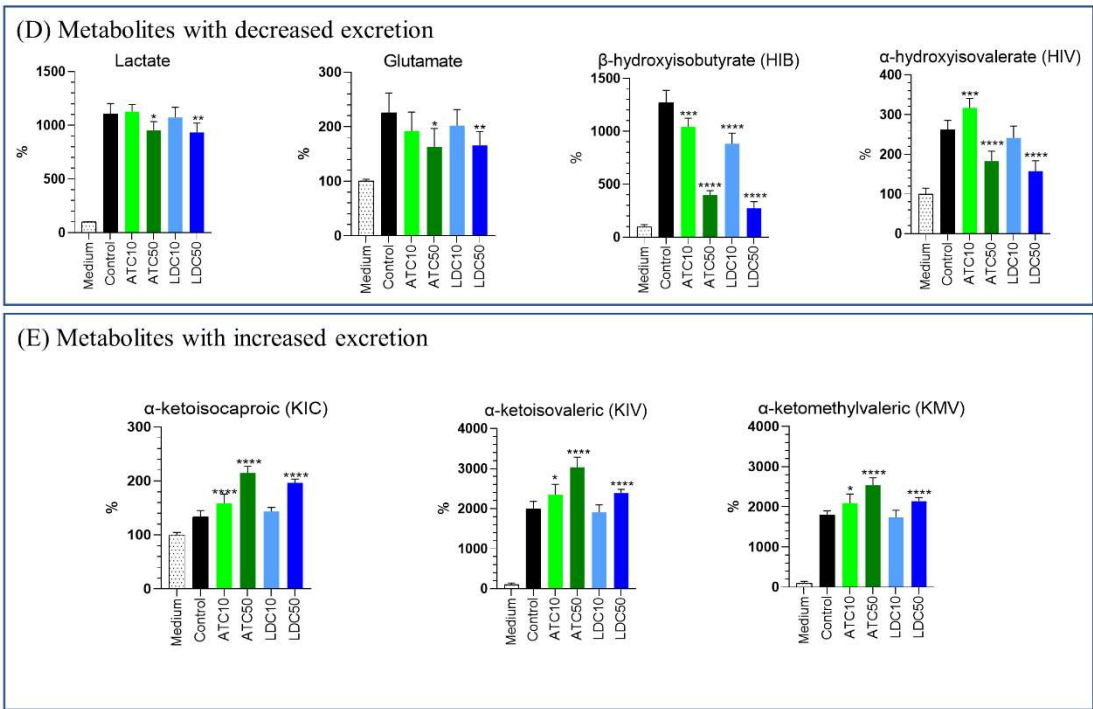

**Table S1.** Metabolites identified in the SH-SY5Y cells' aqueous extracts based on 1D and 2D NMR spectral data. The chemical shifts of signals selected for integration are in bold.

| No. | Compound                     | $\delta$ $^1\text{H}$ in ppm (multiplicity)                                                        |
|-----|------------------------------|----------------------------------------------------------------------------------------------------|
| 1   | Acetate                      | 1.92 (s)                                                                                           |
| 2   | N-Acetylaspartate            | <b>2.03</b> (s); 2.50 (dd); 2.69 (dd); 4.41 (dd)                                                   |
| 3   | ADP + ATP                    | 4.23 (m); 4.39 (m); 4.59 (m); 4.85 (m); 6.16 (d); <b>8.28</b> (s); 8.53 (s)                        |
| 4   | Alanine                      | <b>1.49</b> (d); 3.78 (q)                                                                          |
| 5   | $\beta$ -Alanine             | <b>2.57</b> (t); 3.19 (t)                                                                          |
| 6   | Arginine                     | 1.70 (m); 1.92 (m); 3.26 (t); 3.78 (t)                                                             |
| 7   | Asparagine                   | <b>2.88</b> (dd); 2.94 (dd); 3.99 (dd)                                                             |
| 8   | Aspartate                    | 2.68 (dd); <b>2.81</b> (dd); 3.89 (dd)                                                             |
| 9   | Carnitine                    | 2.44 (m); 3.23 (s); 3.43 (m); 4.57 (m)                                                             |
| 10  | Choline                      | <b>3.21</b> (s); 3.53 (m); 4.07 (m)                                                                |
| 11  | Citrate                      | 2.54 (d); 2.66 (d)                                                                                 |
| 12  | Creatine                     | <b>3.04</b> (s); 3.94 (s)                                                                          |
| 13  | Cystathionine                | 2.17 (m); <b>2.74</b> (m); 3.14 (m); 3.87 (m); 3.97 (m)                                            |
| 14  | Formate                      | <b>8.46</b> (s)                                                                                    |
| 15  | Fumarate                     | <b>6.52</b> (s)                                                                                    |
| 16  | Glucose                      | 3.25 (dd); 3.42 (m); 3.48 (m); 3.55 (dd); 3.74 (m); 3.85 (m); 3.90 (dd); 4.66 (d); <b>5.25</b> (d) |
| 17  | Glutamate                    | 2.08 (m); <b>2.13</b> (m); 2.35 (m); 3.77 (dd)                                                     |
| 18  | Glutamine                    | 2.15 (m); <b>2.46</b> (m); 3.77 (t)                                                                |
| 19  | Glycerophosphocholine        | <b>3.24</b> (s); 3.68 (m); 3.91 (m); 4.32 (m)                                                      |
| 20  | Glycine                      | <b>3.57</b> (s)                                                                                    |
| 21  | GSH                          | 2.17 (m); 2.55 (m); 2.95 (m); 3.80 (m); <b>4.57</b> (m)                                            |
| 22  | GSSG                         | 2.17 (m); 2.55 (m); 2.98 (m); 3.30 (m); 4.76 (m)                                                   |
| 23  | Histidine                    | 3.23 (dd); 3.31 (dd); 4.01 (dd); <b>7.15</b> (s); 8.02 (s)                                         |
| 24  | $\beta$ -Hydroxyisobutyrate  | <b>1.07</b> (d); 2.47 (m); 3.52 (dd); 3.69 (dd)                                                    |
| 25  | <i>myo</i> -Inositol         | 3.30 (t); 3.55 (dd); 3.63 (t); <b>4.08</b> (t)                                                     |
| 26  | Isoleucine                   | <b>0.94</b> (t); 1.01 (d); 1.26 (m); 1.48 (m); 1.98 (m); 3.67 (d)                                  |
| 27  | $\alpha$ -Ketoisovalerate    | <b>1.12</b> (d); 3.01 (m)                                                                          |
| 28  | $\alpha$ -Ketomethylvalerate | 0.90 (t); <b>1.10</b> (d); 1.48 (m); 1.74 (m); 2.94 (m)                                            |
| 29  | Lactate                      | 1.33 (d); <b>4.12</b> (q)                                                                          |
| 30  | Leucine                      | <b>0.96</b> (t); 1.771 (m); 3.78 (m)                                                               |
| 31  | Lysine                       | 1.48 (m); 1.73 (m); 1.91 (m); <b>3.03</b> (t); 3.79 (t)                                            |
| 32  | NAD <sup>+</sup>             | 6.04 (d); 6.10 (d); 8.18 (s); 8.20 (m); <b>8.42</b> (s); 8.84 (d); 9.15 (d); 9.35 (s)              |
| 33  | Pantothenate                 | <b>0.90</b> (s); 0.93 (s); 2.44 (t); 3.40 (d); 3.44 (q); 3.52 (d); 3.99 (s)                        |
| 34  | Phenylalanine                | 3.13 (m); 3.28 (dd); 4.01 (m); <b>7.33</b> (d); 7.38 (d); 7.43 (t)                                 |
| 35  | Phosphocholine               | <b>3.23</b> (s); 3.60 (m); 4.16 (m)                                                                |
| 36  | Phosphocreatine              | <b>3.05</b> (s); 3.96 (s)                                                                          |
| 37  | Phosphoethanolamine          | 3.22 (t); 4.01 (m)                                                                                 |
| 38  | Proline                      | <b>2.00</b> (m); 2.08 (m); 2.35 (m); 3.36 (t); 3.41 (t); 4.14 (t)                                  |
| 39  | Pyroglutamate                | 2.04 (m); 2.41 (m); 2.50 (m); 4.18 (dd)                                                            |
| 40  | Taurine                      | 3.28 (t); 3.43 (t)                                                                                 |
| 41  | Threonine                    | 1.33 (d); 3.61 (d); 4.25 (m)                                                                       |
| 42  | Tyrosine                     | 3.07 (m); 3.20 (m); 3.94 (m); <b>6.91</b> (d); 7.20 (d)                                            |
| 43  | UDP-GlcNAc                   | <b>5.52</b> (dd); 5.95 (d); 5.99 (d); 7.95 (d)                                                     |
| 44  | Valine                       | 0.99 (d); <b>1.03</b> (d); 2.28 (m); 3.62 (d)                                                      |

Multiplicity: s, singlet; d, doublet; dd, doublet of doublets; dt, doublet of triplets; m, multiplet; q, quartet; t, triplet. ADP/ATP, adenosine di/triphosphate; GSH, reduced glutathione; GSSG, oxidized glutathione; NAD<sup>+</sup>, nicotinamide adenine dinucleotide; UDP-GlcNAc, uridine diphosphate-N-acetyl-glucosamine.

**Table S2.** Metabolite variations in the aqueous extracts of ATC- and LDC-treated cells in relation to controls. The values of % variation presented are those used to color-code the heatmap shown in Figure 4 of the manuscript.

| Metabolites           | Variation in relation to control (%) |       |       |        | ±     |       |       |       | t-test (p-value) |        |        |        | Effect Size |       |       |       |
|-----------------------|--------------------------------------|-------|-------|--------|-------|-------|-------|-------|------------------|--------|--------|--------|-------------|-------|-------|-------|
|                       | ATC10                                | ATC50 | LDC10 | LDC50  | ATC10 | ATC50 | LDC10 | LDC50 | ATC10            | ATC50  | LDC10  | LDC50  | ATC10       | ATC50 | LDC10 | LDC50 |
| Asparagine            | -24.6                                | 26.5  | -18.9 | 27.8   | 7.8   | 6.7   | 8.6   | 9.6   | 0.0050           | 0.0007 | 0.0367 | 0.0069 | -1.9        | 2.6   | -1.3  | 2.0   |
| myo-Inositol          | -19.0                                | -42.6 | -16.9 | -50.6  | 1.8   | 1.6   | 2.2   | 1.8   | 0.0000           | 0.0000 | 0.0000 | 0.0000 | -6.2        | -11.8 | -4.5  | -11.9 |
| UDP-GlcNAc            | -18.7                                | -85.9 | -10.8 | -38.7  | 3.5   | 2.7   | 3.0   | 6.6   | 0.0002           | 0.0000 | 0.0036 | 0.0014 | -3.1        | -11.4 | -2.0  | -2.8  |
| Aspartate             | -17.2                                | 23.7  | -12.9 | 12.1   | 6.1   | 3.8   | 5.9   | 4.8   | 0.0119           | 0.0005 | 0.0416 | 0.0220 | -1.6        | 3.9   | -1.2  | 1.5   |
| Glycerophosphocholine | -11.3                                | -75.7 | -11.7 | -33.4  | 7.2   | 7.7   | 5.4   | 6.4   | 0.1305           | 0.0000 | 0.0472 | 0.0011 | -0.9        | -3.9  | -1.2  | -2.4  |
| Glutamine             | -10.8                                | 17.8  | -22.0 | 43.0   | 7.3   | 13.2  | 5.1   | 18.9  | 0.1587           | 0.1568 | 0.0007 | 0.0215 | -0.8        | 0.9   | -2.6  | 1.7   |
| ATP + ADP             | -8.0                                 | -14.0 | -10.4 | -23.0  | 2.1   | 3.0   | 2.2   | 2.6   | 0.0031           | 0.0014 | 0.0006 | 0.0000 | -2.1        | -2.4  | -2.7  | -4.4  |
| beta-Alanine          | -7.4                                 | -60.7 | -10.0 | -72.1  | 2.4   | 1.9   | 1.4   | 2.1   | 0.0178           | 0.0000 | 0.0000 | 0.0000 | -1.7        | -13.8 | -4.1  | -14.0 |
| Glutamate             | -6.3                                 | 25.8  | -16.3 | 0.0    | 2.3   | 7.2   | 4.0   | 3.5   | 0.0178           | 0.0051 | 0.0029 | 0.7153 | -1.5        | 2.4   | -2.4  | 0.0   |
| Isobutyrate           | 0.0                                  | -78.2 | -14.4 | -131.7 | 4.4   | 5.2   | 5.7   | 5.3   | 0.4303           | 0.0000 | 0.0222 | 0.0000 | 0.0         | -5.7  | -1.4  | -7.7  |
| Alanine               | 0.0                                  | 21.3  | 0.0   | 17.1   | 5.5   | 7.0   | 5.5   | 5.9   | 0.0950           | 0.0049 | 0.8083 | 0.0075 | -1.0        | 2.0   | 0.0   | 1.8   |
| Proline               | 0.0                                  | -17.8 | -15.8 | -38.0  | 5.8   | 5.8   | 5.1   | 5.3   | 0.7105           | 0.0155 | 0.0084 | 0.0003 | 0.0         | -1.6  | -1.8  | -3.2  |
| Phosphocreatine       | 0.0                                  | -18.9 | -16.1 | -42.3  | 4.3   | 4.7   | 8.2   | 8.5   | 0.8907           | 0.0040 | 0.0677 | 0.0027 | 0.0         | -2.0  | -1.1  | -2.3  |
| Phosphocholine        | 0.0                                  | 0.0   | 14.1  | 23.7   | 6.9   | 6.6   | 6.6   | 6.1   | 0.5552           | 0.9711 | 0.0746 | 0.0008 | 0.0         | 0.0   | 1.1   | 2.5   |
| Glycine               | 0.0                                  | 42.8  | 16.6  | 48.8   | 2.2   | 2.5   | 3.1   | 3.3   | 1.0000           | 0.0000 | 0.0010 | 0.0000 | 0.0         | 12.5  | 2.6   | 11.6  |
| Lactate               | 0.0                                  | -17.5 | 0.0   | -12.4  | 3.9   | 6.5   | 4.8   | 4.5   | 0.8733           | 0.0293 | 0.7729 | 0.0239 | 0.0         | -1.4  | 0.0   | -1.4  |
| NAD+                  | 0.0                                  | 11.9  | 0.0   | 16.7   | 6.9   | 5.8   | 6.3   | 6.5   | 0.3009           | 0.0738 | 0.1867 | 0.0196 | -0.6        | 1.2   | 0.8   | 1.6   |
| Formate               | 0.0                                  | 40.5  | 17.0  | 58.8   | 9.9   | 9.2   | 9.0   | 7.8   | 0.1970           | 0.0002 | 0.1129 | 0.0000 | -0.7        | 3.2   | 0.9   | 6.3   |
| Creatine              | 9.0                                  | 14.7  | 24.9  | 17.6   | 2.9   | 3.0   | 3.5   | 4.5   | 0.0143           | 0.0003 | 0.0003 | 0.0024 | 1.6         | 3.1   | 3.4   | 2.5   |
| Cystathionine         | 10.9                                 | 0.0   | 12.1  | -28.3  | 3.2   | 3.8   | 2.9   | 4.0   | 0.0096           | 0.3136 | 0.0031 | 0.0001 | 1.7         | 0.0   | 2.1   | -3.4  |
| 2-Ketovaline          | 24.7                                 | 28.3  | 0.0   | 16.5   | 12.8  | 7.9   | 8.6   | 8.3   | 0.1401           | 0.0030 | 0.5099 | 0.0524 | 0.9         | 2.5   | 0.0   | 1.3   |
| Valine                | 27.2                                 | 44.8  | 15.5  | 33.9   | 2.5   | 2.3   | 2.1   | 2.4   | 0.0000           | 0.0000 | 0.0000 | 0.0000 | 5.1         | 14.7  | 3.7   | 9.8   |
| Histidine             | 29.6                                 | 37.5  | 11.8  | 22.5   | 3.1   | 4.7   | 5.2   | 3.5   | 0.0000           | 0.0000 | 0.0642 | 0.0000 | 4.4         | 5.7   | 1.1   | 4.1   |
| Isoleucine            | 30.5                                 | 44.5  | 18.2  | 33.4   | 1.9   | 1.1   | 1.2   | 1.8   | 0.0000           | 0.0000 | 0.0000 | 0.0000 | 7.3         | 30.7  | 7.4   | 13.0  |
| 2-Oxoisoleucine       | 33.8                                 | 34.4  | 0.0   | 21.6   | 11.0  | 7.6   | 10.4  | 8.0   | 0.0266           | 0.0004 | 0.3293 | 0.0160 | 1.4         | 3.1   | 0.0   | 1.7   |
| Leucine               | 39.9                                 | 60.3  | 33.4  | 54.2   | 4.0   | 2.5   | 3.3   | 3.7   | 0.0000           | 0.0000 | 0.0000 | 0.0000 | 4.4         | 20.3  | 4.7   | 11.7  |
| Panthothenic          | 42.7                                 | 40.0  | 11.9  | 14.7   | 3.0   | 2.5   | 3.4   | 3.1   | 0.0000           | 0.0000 | 0.0086 | 0.0003 | 6.2         | 11.4  | 1.8   | 2.9   |
| Phenylalanine         | 43.6                                 | 50.2  | 22.7  | 36.2   | 2.1   | 4.1   | 1.8   | 1.8   | 0.0000           | 0.0000 | 0.0000 | 0.0000 | 9.2         | 9.7   | 6.0   | 13.6  |
